# Supplementary material for: Sol–gel encapsulation extends diatom viability and reveals their silica dissolution capability
Source: Royal Society of Chemistry journal article supplement (doi:10.1039/b609121k), 2006-01-01
Supplement: b609121k.pdf [file b609121k.pdf]

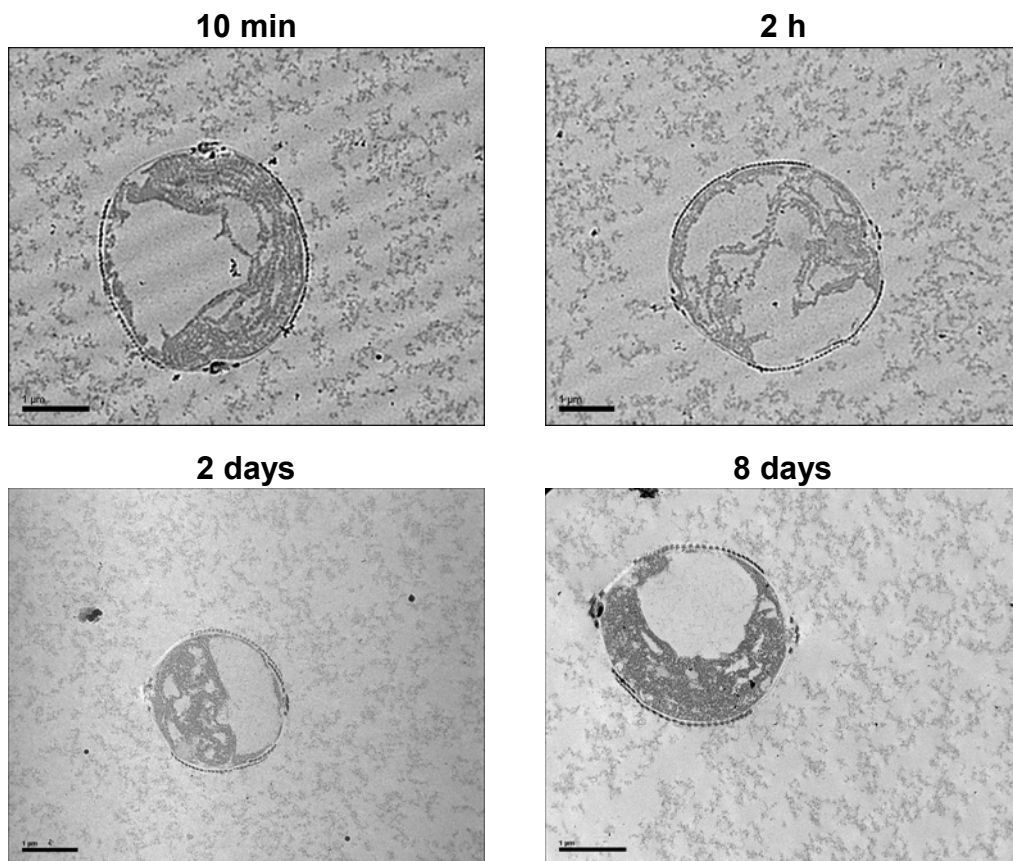

**TEM images of encapsulated-dead cells.** These transversal views demonstrate that there is no dissolution of the silica-gel when *Cylindrotheca fusiformis* were killed (fixed by treatment with 4% glutaraldehyde) prior to encapsulation.
